# Supplementary material for: Atypical PKC-ζ regulates SDF-1–mediated migration and development of human CD34+ progenitor cells
Source: JCI journal article supplement (doi:10.1172/jci21773), 2005-01-03
Supplement: sd1 [file 1]

**Supplementary data legend:**

**Video 1: Representative laminar shear flow experiment with G2 cells perfused on VCAM-1/SDF-1 coated plate. Magnification x20.**

**Video 2: Representative laminar shear flow experiment with G2 cells pre-treated with PKC- $\zeta$  PS peptides (10  $\mu$ M, one hour) perfused on VCAM-1/SDF-1 coated plate. Magnification x20.**

**Video 3: Representative laminar shear flow experiment with G2 cells perfused on VCAM-1/SDF-1 coated plate. Magnification x10.**

**Video 4: Representative laminar shear flow experiment with B1 cells perfused on VCAM-1/SDF-1 coated plate. Magnification x10.**
